# Supplementary material for: Clinical contribution of lipid profiles to the stroke progression in Chinese population: a single-centered cohort study
Source: Research Square preprint supplement (doi:10.21203/rs.3.rs-6625180/v1), 2025-06-09
Supplement: Supplementary file 1 [file 23edd0c9577ffd451f2bf6c2.docx]

**Supplemental materials**

**Clinical contribution of apoB 100 to the stroke progression in Chinese population: a single-centered cohort study**

Duanlu Hou1,2#, Yuanyuan Wang1#, Shuang Zhai1#, Xiaoli Yang1, Yuping Tang3*, Danhong Wu1*

1. Department of Neurology, Shanghai Fifth People’s Hospital, Fudan University, Shanghai, China
2. Department of Neurology, Shanghai General Hospital, Shanghai Jiao Tong University School of Medicine, Shanghai, China
3. Department of Neurology, Huashan Hospital, Fudan University, Shanghai, China

# The authors contribute equally to this article and share the first authorship.

*Correspondence

Yuping Tang, MD, PhD

No.12, Mid-Wulumuqi Road, Shanghai, 200041, China

Tel: 13764480396

E-mail: tangyuping39@163.com

Danhong Wu, MD

No. 801, Heqing Road, Shanghai, 200240, China

Tel: 18116125596

E-mail: danhongwu@fudan.edu.cn

**Expanded Materials & Methods**

Inclusion and exclusion criteria

Patients were included in the present study if they met the following criteria: (1) diagnosed with acute mild stroke (acute ischemic stroke [AIS] with National Institute of Health Stroke Scale [NIHSS] > 0) within 24 h of onset; (2) aged 18 years or older; and (3) completed a head magnetic resonance imaging (MRI) or computed tomography (CT) within 48 h. AIS was diagnosed if there were new focal neurological deficits explained by relevant lesions detected on head diffusion-weighted imaging (DWI). According to the relevant guidelines, if the patients in the cohort met the criteria of thrombolysis, they were treated with intravenous alteplase, or rtPA (dosage = 0.9 mg/kg × patient’s body weight (kg); 10% of the dosage was injected intravenously as a bolus within the first minute, and the remaining 90% was injected intravenously within 1 h) or neuro-intervention. The inclusion/exclusion criteria for thrombolysis followed Chinese guidelines.

Patients were excluded if they met the following criteria: (1) previous AIS or cerebral hemorrhage; (2) pregnant patients; (3) severe heart (with cardiac function in grade 3 or 4 according to the New York Heart Association or left ventricular ejection fraction < 40% on echocardiography), lung (with blood oxygen saturation less than 95% and symptoms of shortness of breath, cyanosis, and abnormal blood gas analysis), liver (serum alanine aminotransferase levels > 10-fold the upper limit of the reference range), kidney (serum creatinine > 443 μmol/L), and neoplastic diseases; (4) autoimmune diseases; and (5) infection symptoms or signs present at stroke onset.

Sample size calculation

The number of participants required for the study was calculated by using R language. The prevalence rate of positive results in general population (p0) and in stroke patients (p1) were set at 0.4 and 0.2 respectively according to the previous study. A 2-sided 0.05 level of significance and sample size of 216 patients (108 per groups) provided 90% statistical power to demonstrate the differences in the primary outcomes. To accommodate for 15% attrition rate, we finally recruited 262 participants.

| **Supplementary tables**  **STable 1. Comparisons between thrombolysis-treated ischemic stroke patients with or without improvement** | | | |
| --- | --- | --- | --- |
|  | With improvement (n=62) | Without improvement(n=100) | *p* |
| Demographic data | | | |
| Age, years**†** | 67.1(11.6) | 67.3(11.7) | 0.91 |
| Female | 35(56%) | 32(32%) | 0.004* |
| Hypertension | 48(77%) | 82(82%) | 0.48 |
| Diabetes mellitus  Atrial fibrillation  Coronary artery disease | 22(36%)  15(24%)  6(10%) | 34(34%)  11(11%)  7(7%) | 0.85  0.045*  0.54 |
| Smoking | 21(34%) | 42(42%) | 0.30 |
| Drinking | 6(10%) | 21(21%) | 0.06 |
| Fatty liver | 28(45%) | 43(43%) | 0.79 |
| Admission NIHSS**†** | 8.5(3.8) | 4.7(3.2) | < .001* |
| 7-day NIHSS | 3(4) | 3(4) | 0.65 |
| Laboratory data**†** | | | |
| ApoB 100, ng/ml | 31.7(14.1) | 29.5(14.3) | 0.34 |
| RC, mmol/L | 0.4(0.3) | 0.5(0.3) | 0.76 |
| TC, mmol/L | 4.3(1) | 4.6(3) | 0.33 |
| TG, mmol/L | 1.4(0.9) | 1.4(1.0) | 0.85 |
| HDL, mmol/L | 1.1(0.3) | 1.2(0.4) | 0.13 |
| LDL, mmol/L | 2.8(0.8) | 2.9(1.0) | 0.26 |
| HCY, μmol/L | 15.6(10.1) | 12.3(7.5) | 0.78 |
| Lp(a), nmol/L | 54.7(88.4) | 44.0(57.2) | 0.86 |
| HbA1C, mmol/L | 6.5(1.4) | 6.7(1.8) | 0.90 |
| ALT,mmol/L | 18.2(19.1) | 17.0(11.9) | 0.62 |
| INR | 1(0.2) | 1(0.1) | 0.21 |
| Imaging | | | |
| White matter lesions | 52(84%) | 91(91%) | 0.34 |
| Microbleeds | 40(64%) | 66(66%) | 0.63 |
| MCA stenosis | 18(29%) | 21(21%) | 0.47 |
| ACA stenosis | 7(5%) | 6(8%) | 0.38 |
| PCA stenosis | 7(11%) | 16(16%) | 0.48 |
| BA stenosis | 4(7%) | 7(7%) | 0.73 |
| Abbreviations: NIHSS = National Institute of Health stroke scale; RC = remnant cholesterol; TC = total cholesterol; TG = total triglyceride; HDL = high density lipoprotein; LDL = low density lipoprotein; HCY = homocysteine; ALT = alanine transaminase; INR = international normalized ratio; MCA = middle cerebral artery; ACA = anterior cerebral artery; PCA = posterior cerebral artery; BA = basilar artery.  Unless specified, values are numbers of patients (%).  **†**Mean (standard deviation).  *Statistically significant. | | | |

| **STable 2. Comparisons between non-thrombolysis-treated ischemic stroke patients with or without improvement** | | | |
| --- | --- | --- | --- |
|  | With improvement (n=60) | Without improvement(n=37) | *p* |
| Demographic data | | | |
| Age, years**†** | 65.6(11.0) | 65.9(11.7) | 0.89 |
| Female | 18(30%) | 9(24%) | 0.545 |
| Hypertension | 50(83%) | 28(76%) | 0.36 |
| Diabetes mellitus  Atrial fibrillation  Coronary artery disease | 20(33%)  3(5%)  6(10%) | 18(49%)  3(8%)  3(8%) | 0.13  0.54  0.76 |
| Smoking | 26(43%) | 12(32%) | 0.29 |
| Drinking | 16(27%) | 10(27%) | 0.97 |
| Fatty liver | 31(53%) | 16(46%) | 0.47 |
| Admission NIHSS**†** | 4.6(2.6) | 2.9(3.0) | < .001* |
| 7-day NIHSS | 3(4) | 3(4) | 0.65 |
| Laboratory data**†** | | | |
| ApoB 100, ng/ml | 31.7(14.1) | 29.5(14.3) | 0.34 |
| TC, mmol/L | 4.5(0.9) | 4.6(1.3) | 0.59 |
| TG, mmol/L | 1.6(0.8) | 1.5(0.7) | 0.81 |
| HDL, mmol/L | 1.1(0.3) | 1.1(0.4) | 0.93 |
| LDL, mmol/L | 2.9(0.9) | 3.1(1.2) | 0.56 |
| HCY, μmol/L | 14.9(10.1) | 16.0(7.5) | 0.78 |
| Lp(a), nmol/L | 43.0(50.4) | 55.3(55.2) | 0.27 |
| HbA1C, mmol/L | 6.7(1.8) | 6.7(1.9) | 0.87 |
| ALT,mmol/L | 20.6(14.9) | 15.1(6.9) | 0.06 |
| INR | 1(0.1) | 1(0.1) | 0.24 |
| Imaging | | | |
| White matter lesions | 52(84%) | 91(91%) | 0.34 |
| Microbleeds | 40(64%) | 66(66%) | 0.63 |
| MCA stenosis | 18(29%) | 21(21%) | 0.47 |
| ACA stenosis | 7(5%) | 6(8%) | 0.38 |
| PCA stenosis | 7(11%) | 16(16%) | 0.48 |
| BA stenosis | 4(7%) | 7(7%) | 0.73 |
| Imaging | | | |
| White matter lesions | 57(95%) | 32(86%) | 0.27 |
| Microbleeds | 33(55%) | 21(57%) | 0.96 |
| MCA stenosis | 8(13%) | 8(22%) | 0.29 |
| ACA stenosis | 7(12%) | 0(0%) | 0.07 |
| PCA stenosis | 10(17%) | 8(22%) | 0.45 |
| BA stenosis | 9(15%) | 2(5%) | 0.23 |
| Abbreviations: NIHSS = National Institute of Health stroke scale; TC = total cholesterol; TG = total triglyceride; HDL = high density lipoprotein; LDL = low density lipoprotein; HCY = homocysteine; ALT = alanine transaminase; INR = international normalized ratio; MCA = middle cerebral artery; ACA = anterior cerebral artery; PCA = posterior cerebral artery; BA = basilar artery.  Unless specified, values are numbers of patients (%).  **†**Mean (standard deviation).  *Statistically significant. | | | |

| **STable 3. Multivariable regression analysis of factors for symptomatic improvement in patients with or without thrombolysis** | | | | |
| --- | --- | --- | --- | --- |
|  | Beta | OR | *p* | 95%CI |
| Admission NIHSS | 0.19 | 1.21 | .007* | 1.05-1.38 |
| age | 0.006 | 1 | 0.75 | 0.96-1.01 |
| ApoB 100 | -0.13 | 0.87 | < .001* | 0.84-0.91 |
| sex | 0.47 | 1.59 | 0.28 | 0.67-3.77 |
| After adjusting TG, TC, LDL, HDL, Lpa, and glucose levels.  Abbreviations: OR, odd ratio; NIHSS, National Institute of Health stroke scale; TC = total cholesterol; TG = total triglyceride; HDL = high density lipoprotein; LDL = low density lipoprotein. *indicates statistically significant. | | | | |

sFigure 1 Examples of decision trees (No.0, 1) and there were 100 (0-99) trees showing the analytic process of the random forest
